# Supplementary material for: Luminescent conjugates between dinuclear rhenium complexes and 17α-ethynylestradiol: synthesis, photophysical characterization, and cell imaging
Source: Royal Society of Chemistry journal article supplement (doi:10.1039/c8ob02472c), 2018-12-11
Supplement: c8ob02472c1.pdf [file c8ob02472c1.pdf]

## Supplementary Information

### Luminescent conjugates between dinuclear rhenium complexes and 17 $\alpha$ -Ethinylestradiol: synthesis, photophysical characterization, and cell imaging

Matteo Proverbio,<sup>a</sup> Elsa Quartapelle Procopio,<sup>a</sup> Monica Panigati,<sup>a,b\*</sup> Silvia Mercurio,<sup>c</sup> Roberta Pennati,<sup>c</sup> Miriam Ascagni,<sup>d</sup> Roberta Leone,<sup>c</sup> Caterina La Porta,<sup>c,e</sup> Michela Sugni<sup>c,e\*</sup>

<sup>a</sup> Dipartimento di Chimica, Università degli Studi di Milano, via Golgi 19, 20133 Milano, Italy

<sup>b</sup> Istituto per lo Studio delle Macromolecole, Consiglio Nazionale delle Ricerche (ISMAR-CNR), Via E. Bassini, 15, 20133 Milano, Italy

<sup>c</sup> Dipartimento di Scienze e Politiche Ambientali, Università degli Studi di Milano, via Celoria 26, 20133 Milano, Italy

<sup>d</sup> Unitech NOLIMITS, Università degli Studi di Milano, via Celoria 19, 20133 Milano, Italy

<sup>e</sup> Centro per la Complessità e Biosistemi Università degli Studi di Milano

[monica.panigati@unimi.it](mailto:monica.panigati@unimi.it)

[michela.sugni@unimi.it](mailto:michela.sugni@unimi.it)

#### Content

|                                                                                         |          |
|-----------------------------------------------------------------------------------------|----------|
| Compounds characterization: NMR and Mass spectra                                        | pg. 2-18 |
| <b>Figure S1:</b> Complexes <b>E2-Re1</b> and <b>Re-4Me</b> stain 231 cell lines        | pg. 19   |
| <b>Figure S2:</b> wide field image of MCF-7 cells recorded after the addition of E2-Re1 | pg. 19   |

## Compound D1

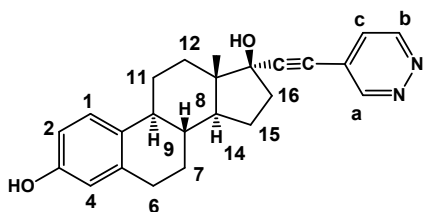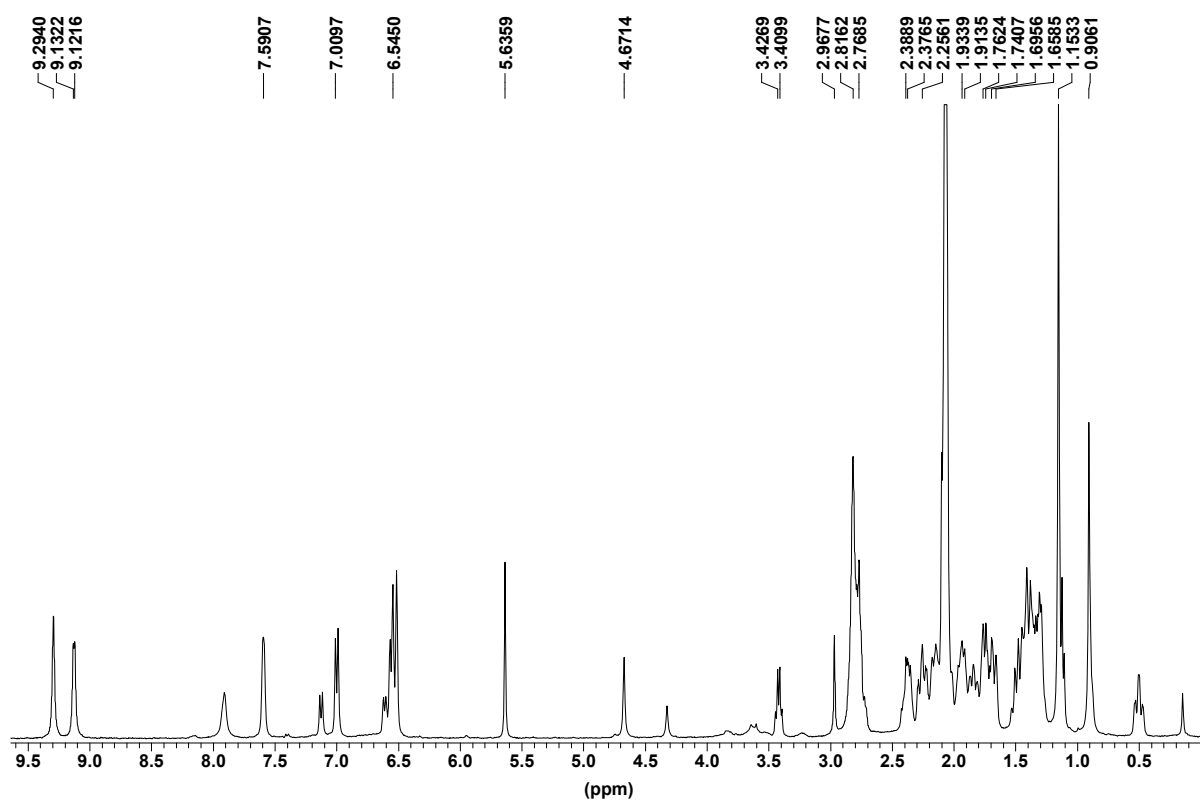

<sup>1</sup>H NMR (Acetone-d<sub>6</sub>, 298 K):  $\delta$  = 9.29 (1H, s, H<sub>a</sub> pydz ), 9.13 (1H, d, H<sub>b</sub> pydz ), 7.59 (1H, d, H<sub>c</sub> pydz ), 7.09 (1H, d, H<sub>4</sub>), 6.54 (2H, m, H<sub>1</sub>, H<sub>2</sub> ), 4.67 (1H, s, 3-OH ), 2.81 (1H, m, H<sub>6</sub>), 2.5-2.0 (3H, m, H<sub>11</sub> $\alpha$ , H<sub>11</sub> $\beta$ , H<sub>12</sub> $\beta$ ), 2.00-1.6 (5H, m, H<sub>9</sub>, H<sub>15</sub> $\alpha$ , H<sub>15</sub> $\beta$ , H<sub>7</sub> $\alpha$ , H<sub>16</sub> $\alpha$ ), 1.5-1.3 (4H, m, H<sub>8</sub>, H<sub>14</sub>, H<sub>7</sub> $\beta$ , H<sub>12</sub> $\alpha$ ), 1.15 (3H, CH<sub>3</sub>), 0.5 (1H, m, H<sub>16</sub> $\beta$ ).

## Compound D2

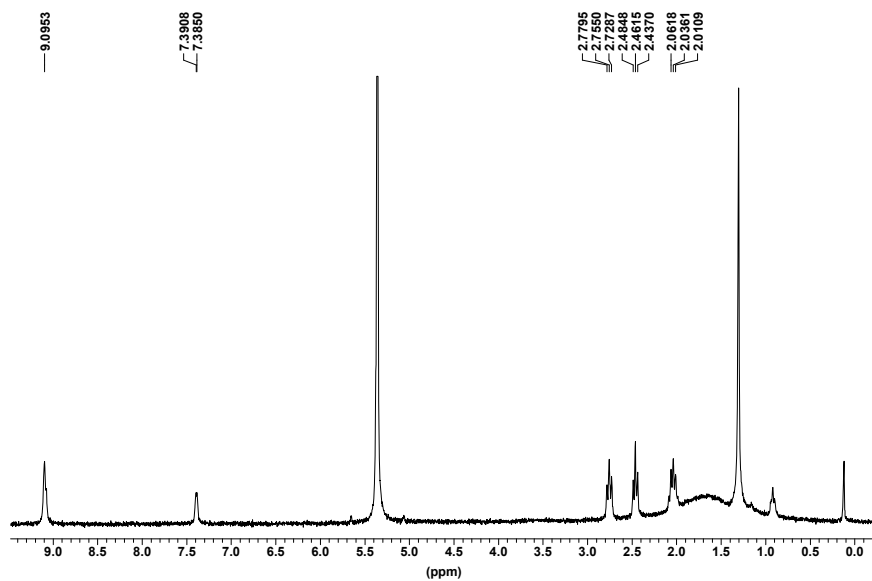

$^1\text{H NMR}$  ( $\text{CD}_2\text{Cl}_2$ , 298 K):  $\delta = 9,09$  (2H, s ), 7,39 (1H, s ), 2,75 (2H, m), 2,46 (2H, m), 2,06 (2H, m )

## Compound D3

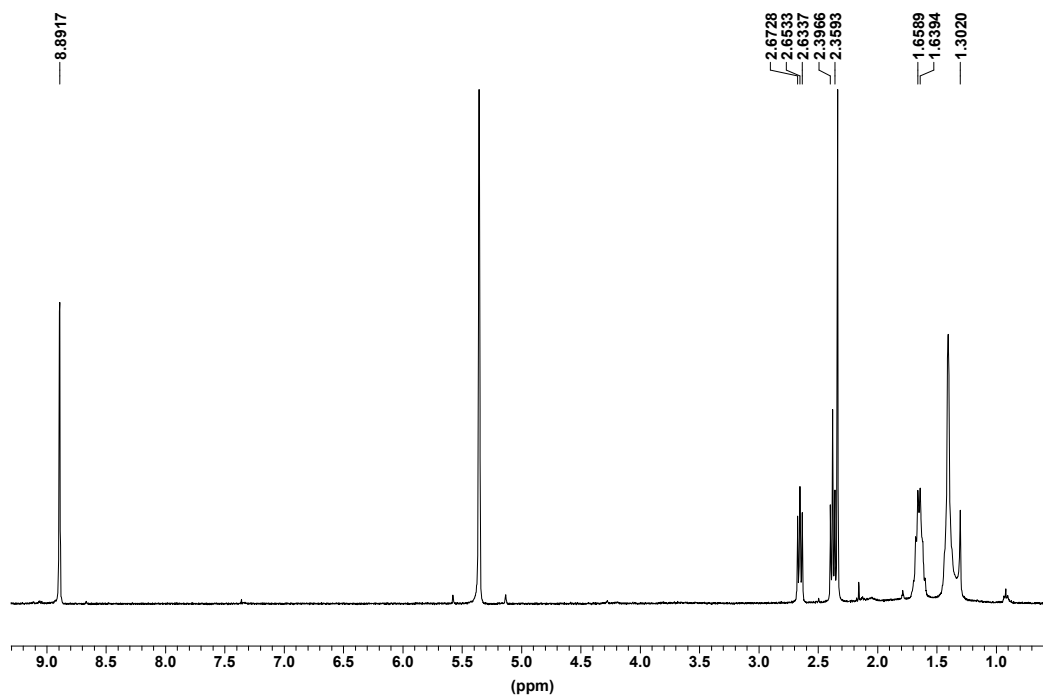

$^1\text{H NMR}$  ( $\text{CD}_2\text{Cl}_2$ , 298 K):  $\delta$  1.76-1.30 (m, 10H,  $\text{CH}_2\text{-(CH}_2)_5\text{-CH}_2\text{-COOH}$ ), 2.40 (t,  $J = 7.0$ , 2H,  $\text{CH}_2\text{-(CH}_2)_5\text{-CH}_2\text{-COOH}$ ), 2.36 (s, 3H,  $\text{CH}_3$ ), 2.65 (pt, 2H,  $\text{CH}_2\text{-(CH}_2)_5\text{-CH}_2\text{-COOH}$ ), 8.89 (s, 2H,  $\text{H}_{ortho}$  accidental overlap) ppm.

## Complex E2-Re1

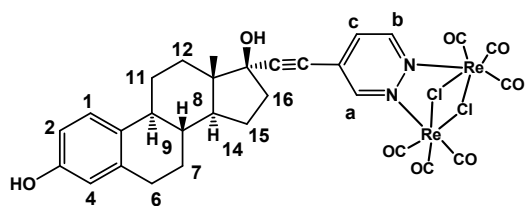

Chemical Formula:  $C_{30}H_{26}Cl_2N_2O_8Re_2$

Molecular Weight: 986.02

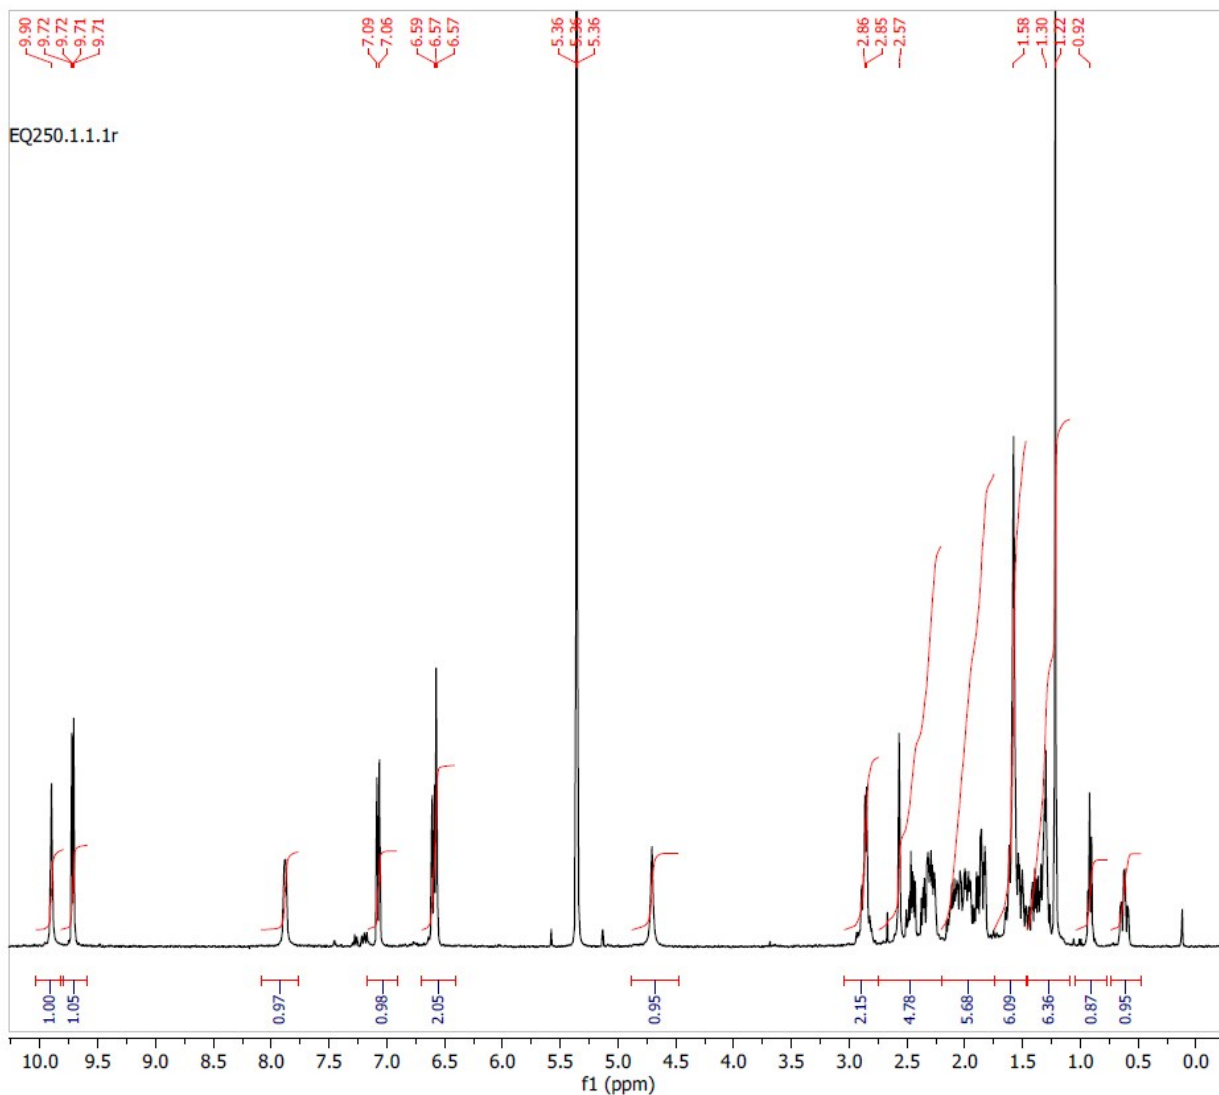

$^1H$  NMR ( $CD_2Cl_2$ , 400 MHz, 298 K):  $\delta$  = 9.90 (1H, s,  $H_a$  pydz), 9.72 (1H, d,  $H_b$  pydz), 7.87 (1H, d,  $H_c$  pydz), 7.09 (1H, d, H1), 6.57 (2H, m, H2, H4), 4.71 (1H, s, 3-OH), 2.86 (2H, m, H6), 2.55-2.2 (3H, m, H11 $\alpha$ , H11 $\beta$ , H12 $\beta$ ), 2.10-1.75 (5H, m, H9, H15 $\alpha$ , H15 $\beta$ , H7 $\alpha$ , H16 $\alpha$ ), 1.6-1.3 (4H, m, H8, H14, H7 $\beta$ , H12 $\alpha$ ), 1.22 (3H,  $CH_3$ ), 0.62 (1H, m, H16 $\beta$ )

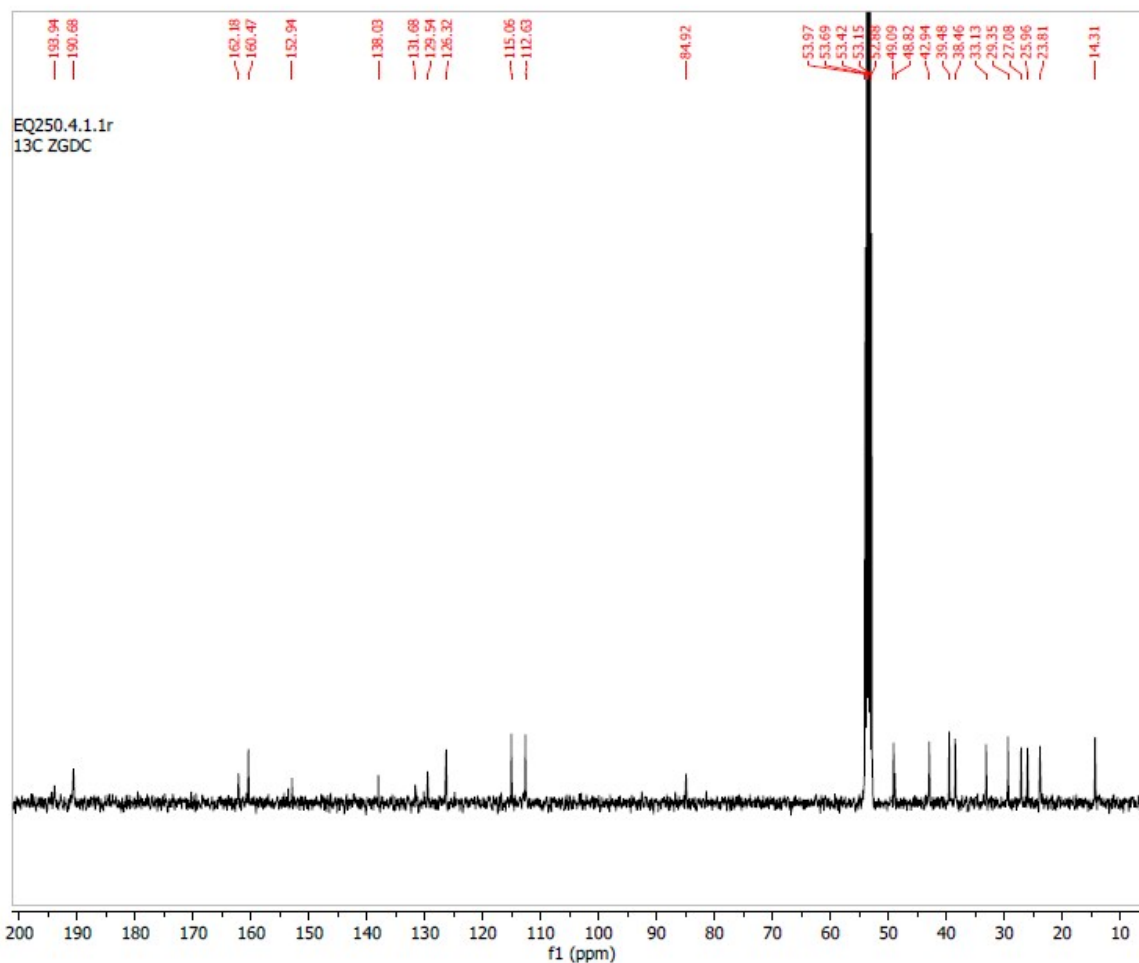

$^{13}\text{C}$  NMR ( $\text{CD}_2\text{Cl}_2$ , 400 MHz, 298 K):  $\delta$  = 193.95 (1C, CO), 190.08 (1C, CO), 162.18 (1C,  $\text{C}_a$  pydz), 160.48 (2C,  $\text{C}_b$  pydz + quater), 153.58 (1C, CO), 152.94 (1C, CO), 138.03 (1C, CO), 131.68 (1C, CO), 129.54 (1C,  $\text{C}_c$  pydz), 126.33 (1C,  $\text{C}_1$  estradiol), 115.06 (1C,  $\text{C}_4$  estradiol), 112.63 (1C,  $\text{C}_2$  estradiol), 84.92 (1C, quater), 49.09 (1C,  $\text{C}_{14}$  estradiol), 48.81 (1C, quater), 42.94 (1C,  $\text{C}_9$  estradiol), 39.48 (1C,  $\text{C}_8$  estradiol), 38.45 (1C,  $\text{C}_{11}$  estradiol), 33.12 (1C,  $\text{C}_{16}$  estradiol), 29.35 (1C,  $\text{C}_6$  estradiol), 27.98 (1C,  $\text{C}_7$  estradiol), 25.96 (1C,  $\text{C}_{12}$  estradiol), 23.81 (1C,  $\text{C}_{15}$  estradiol), 14.31 (1C,  $\text{CH}_3$  estradiol).

COSY @400MHz in CD<sub>2</sub>Cl<sub>2</sub>  
EQ250.2.1.2rr  
COSYGP (correlata 1H-1H)

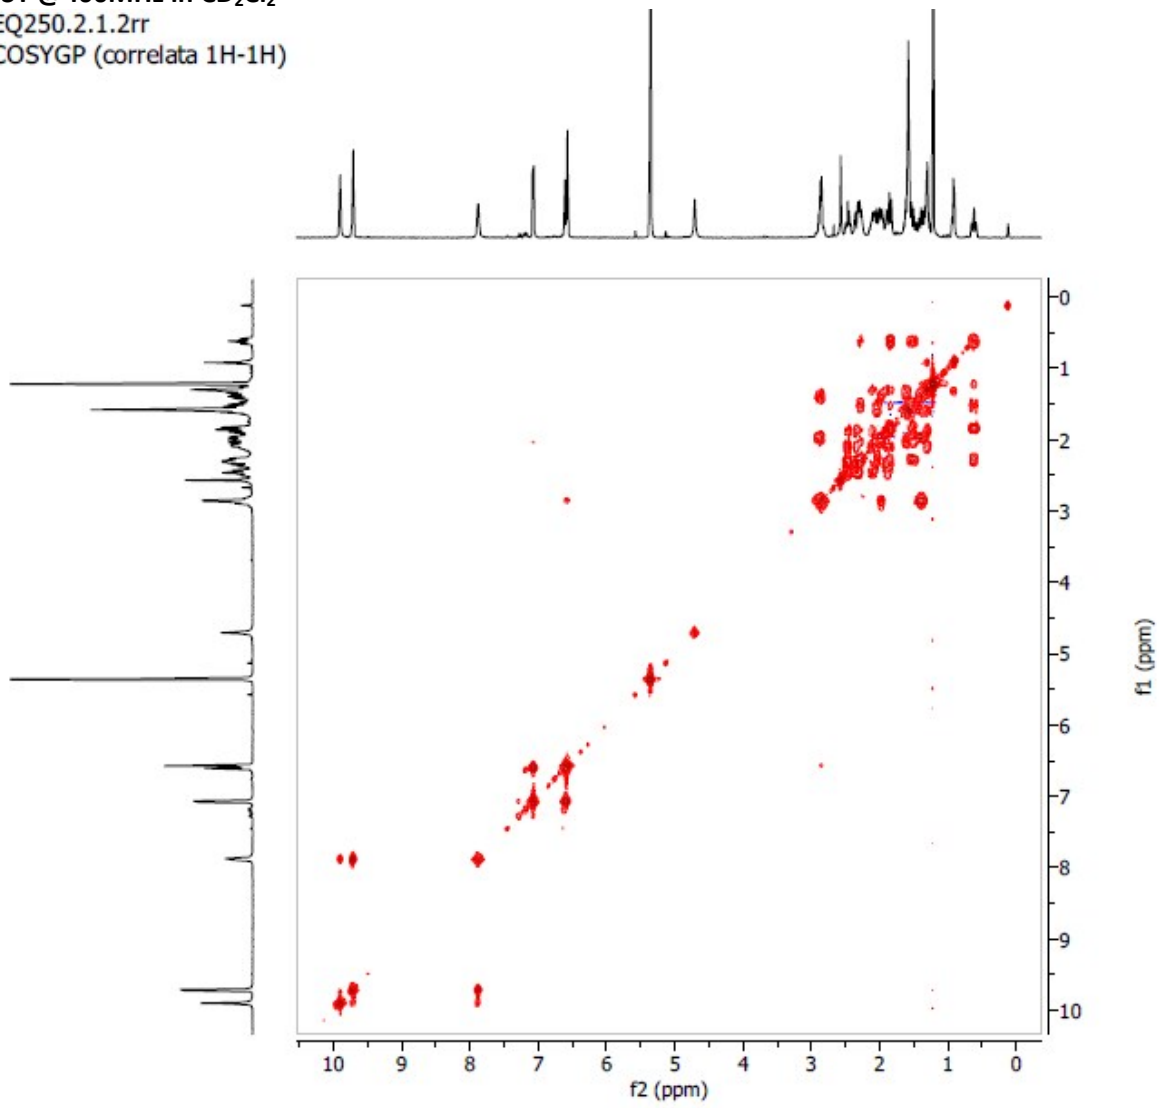

HSQC @400MHz in CD<sub>2</sub>Cl<sub>2</sub>

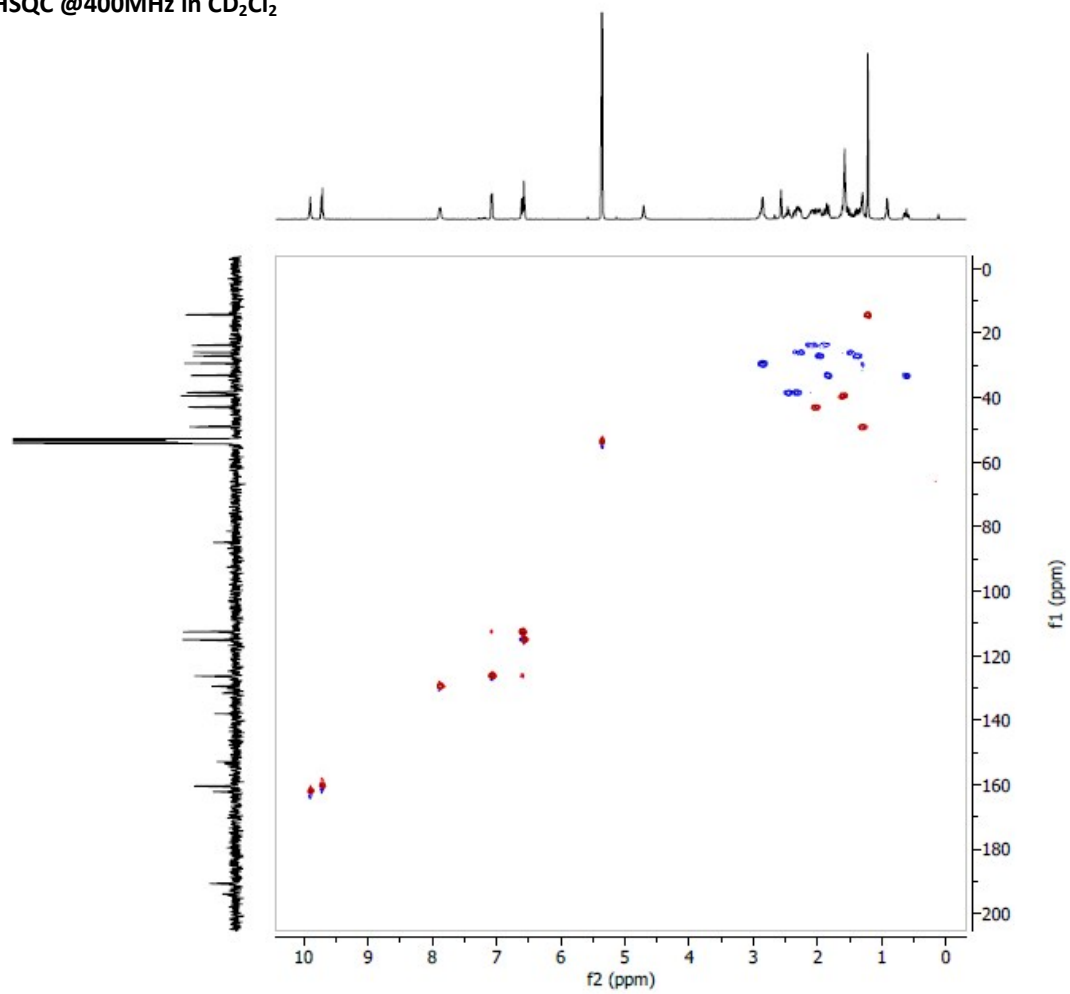

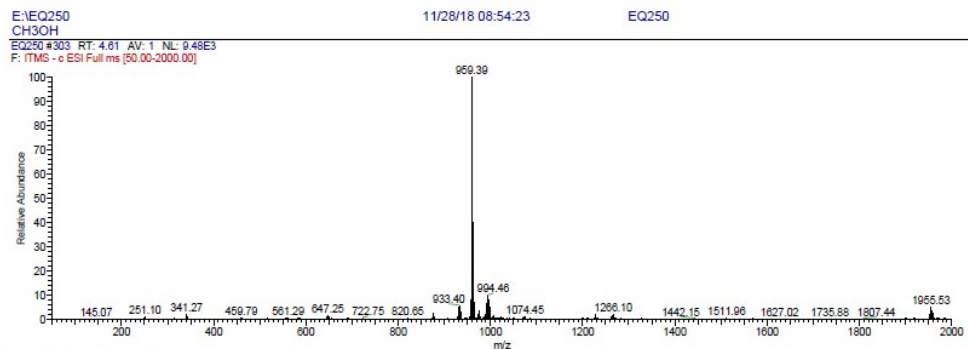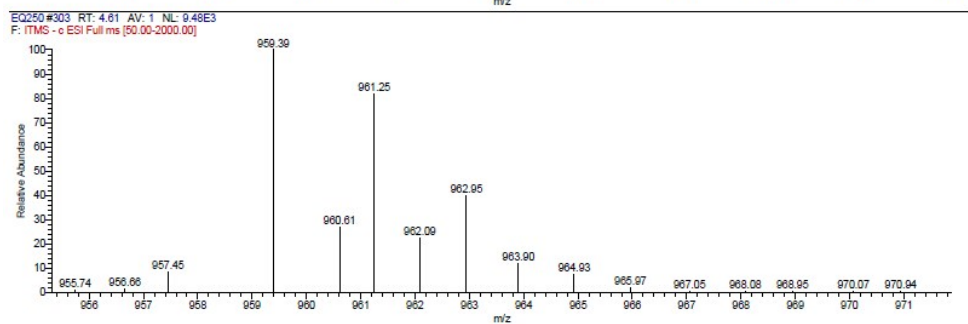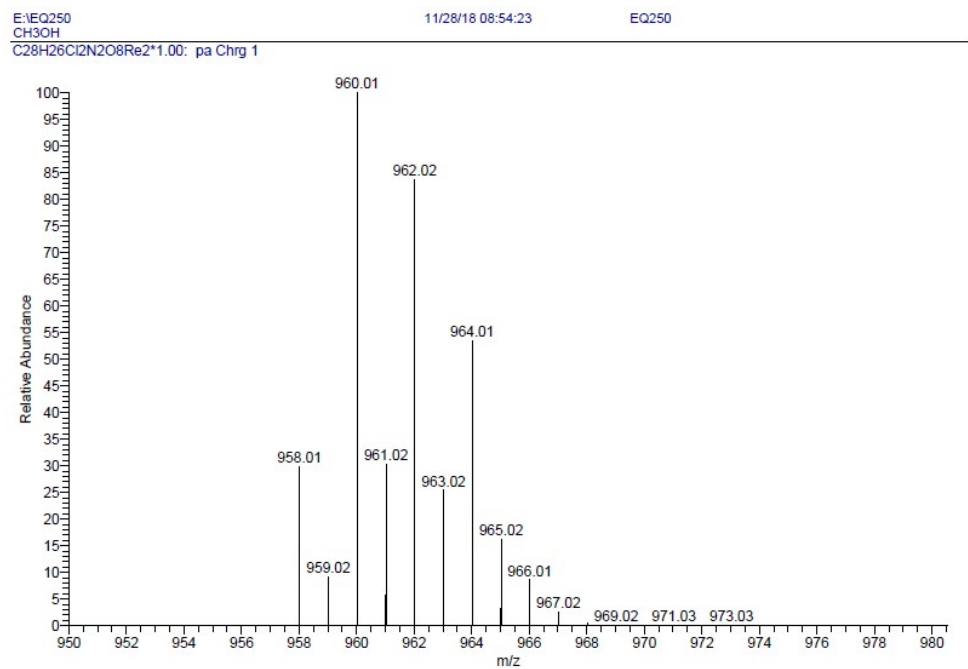

ESI-MS experimental and calculated (right) isotopic distribution for the **E2-Re1**



### Complex Re2

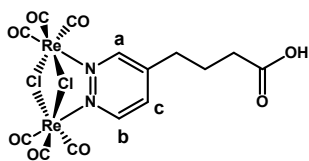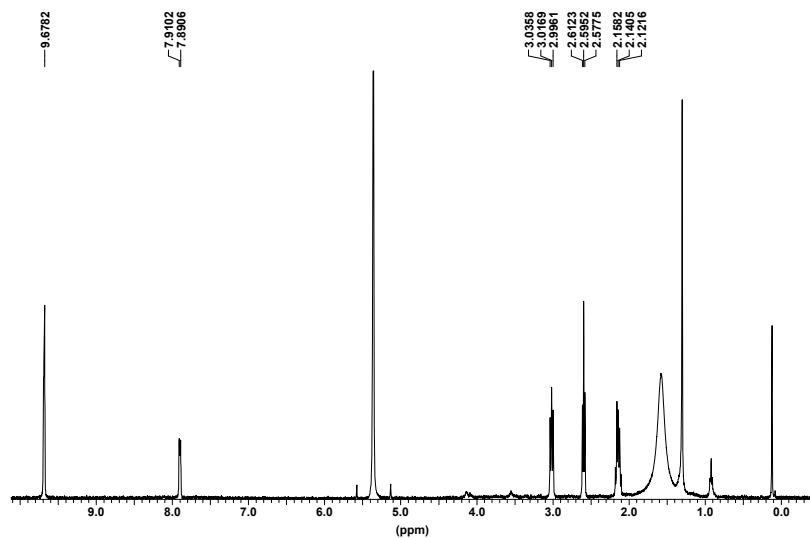

$^1\text{H}$  NMR ( $\text{CD}_2\text{Cl}_2$ , 400 MHz, 298 K):  $\delta = 9.68$  (2H, m,  $\text{H}_a + \text{H}_b$  pydz),  $7.90$  (1H, m,  $\text{H}_c$  pydz),  $3.01$  (2H, m,  $\text{CH}_2\text{-CH}_2\text{-CH}_2\text{-COOH}$ ),  $2.59$  (2H, m,  $\text{CH}_2\text{-CH}_2\text{-CH}_2\text{-COOH}$ ),  $2.14$  (2H, m,  $\text{CH}_2\text{-CH}_2\text{-CH}_2\text{-COOH}$ ).

### Complex Re3

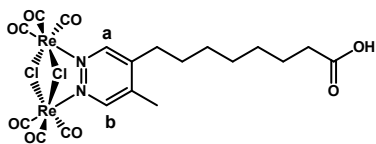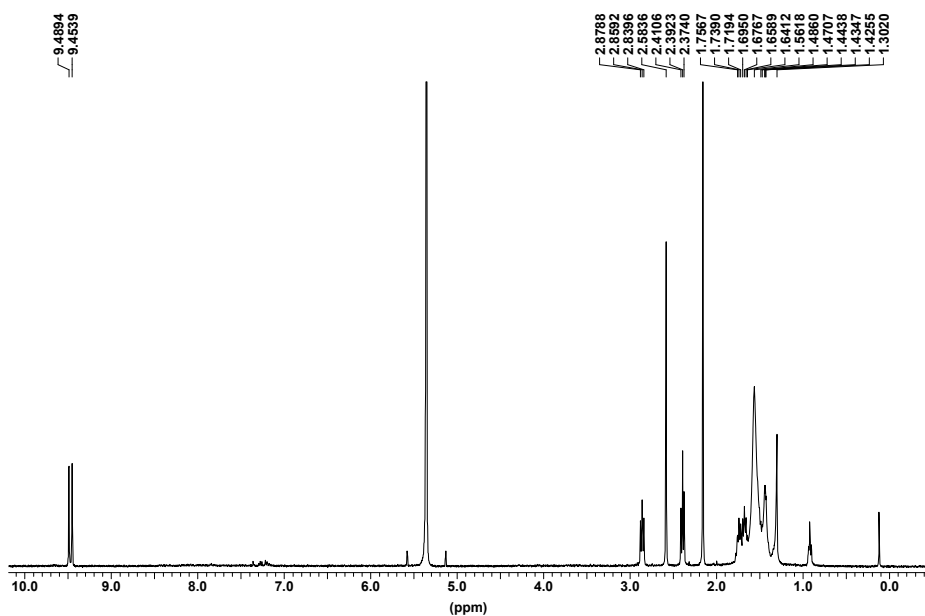

$^1\text{H}$  NMR ( $\text{CD}_2\text{Cl}_2$ , 400 MHz, 298 K):  $\delta = 9.49$  (1H, s,  $\text{H}_a$ ),  $9.45$  (1H, s,  $\text{H}_b$  pydz),  $2.86$  (2H, m,  $\text{CH}_2\text{-COOH}$ ),  $2.58$  (3H, s,  $\text{CH}_3$ ),  $2.39$  (2H, m, pydz- $\text{CH}_2$ ),  $1.8\text{-}1.4$  (10H,  $\text{CH}_2$  aliphatic chain).

Compound E0

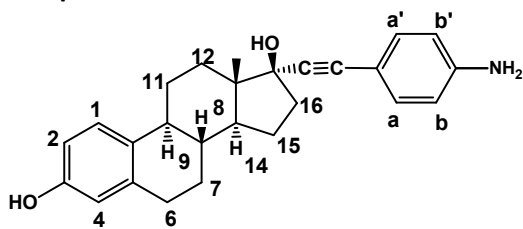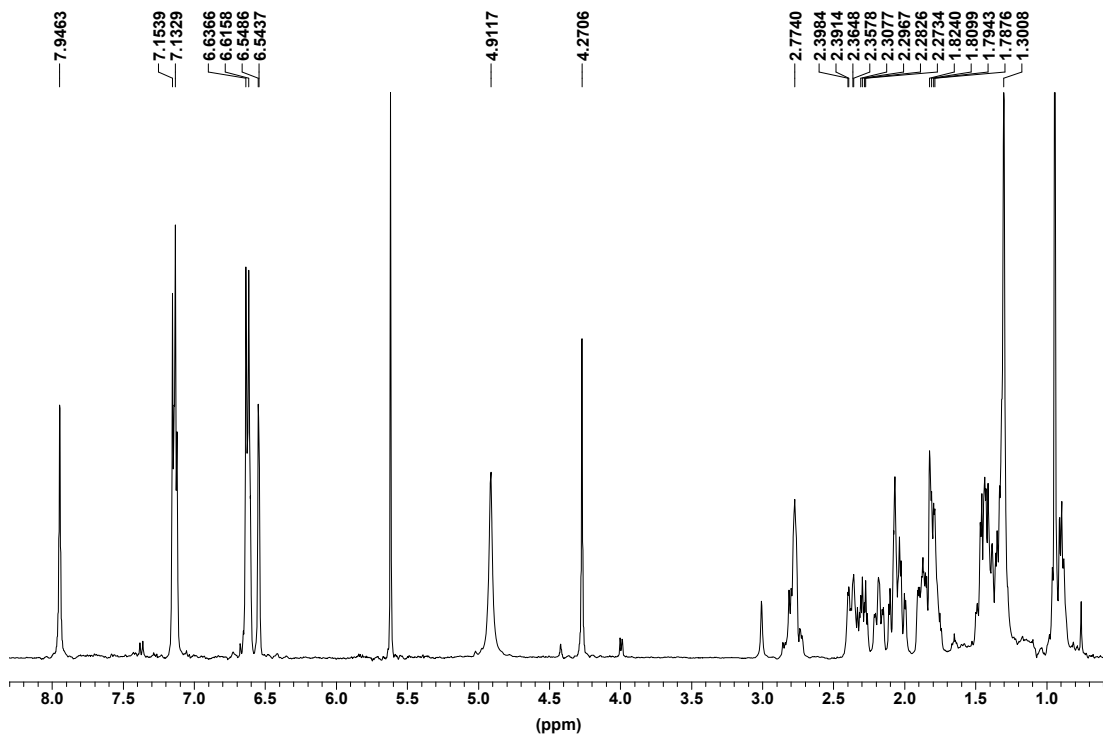

$^1\text{H}$  NMR ( $\text{CD}_2\text{Cl}_2$ , 400 MHz, 298 K):  $\delta$  = 7.94 (1H, d, H1 estradiol), 7.14 (2H, d,  $\text{H}_b + \text{H}_{b'}$ ), 6.62 (3H, m,  $\text{H}_a + \text{H}_{a'}$  and H2 estradiol), 6.54 (1H, H4 estradiol), 4.91 (1H, s, 3-OH), 4.27 (2H,  $\text{NH}_2$ ), 2.77 (2H, m, H6), 2.4-2.15 (3H, m,  $\text{H}_{11\alpha}$ , H9,  $\text{H}_{12\beta}$ ), 2.10-1.70 (6H, m,  $\text{H}_{14}$ ,  $\text{H}_{15\alpha}$ ,  $\text{H}_{7\alpha}$ ,  $\text{H}_{16\beta}$ ,  $\text{H}_{16\alpha}$ ,  $\text{H}_{11\beta}$ ), 1.5-1.3 (3H, m, H8,  $\text{H}_{12\alpha}$ ,  $\text{H}_{7\beta}$ ), 0.95 (3H,  $\text{CH}_3$ )

## Complex E2-Re2

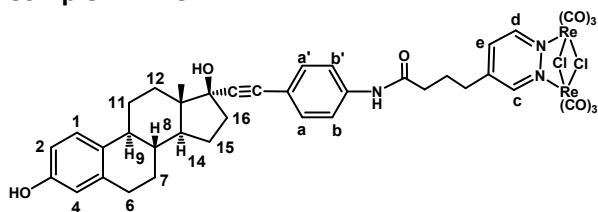

Chemical Formula:  $C_{40}H_{37}Cl_2N_3O_9Re_2$

Molecular Weight: 1147.10

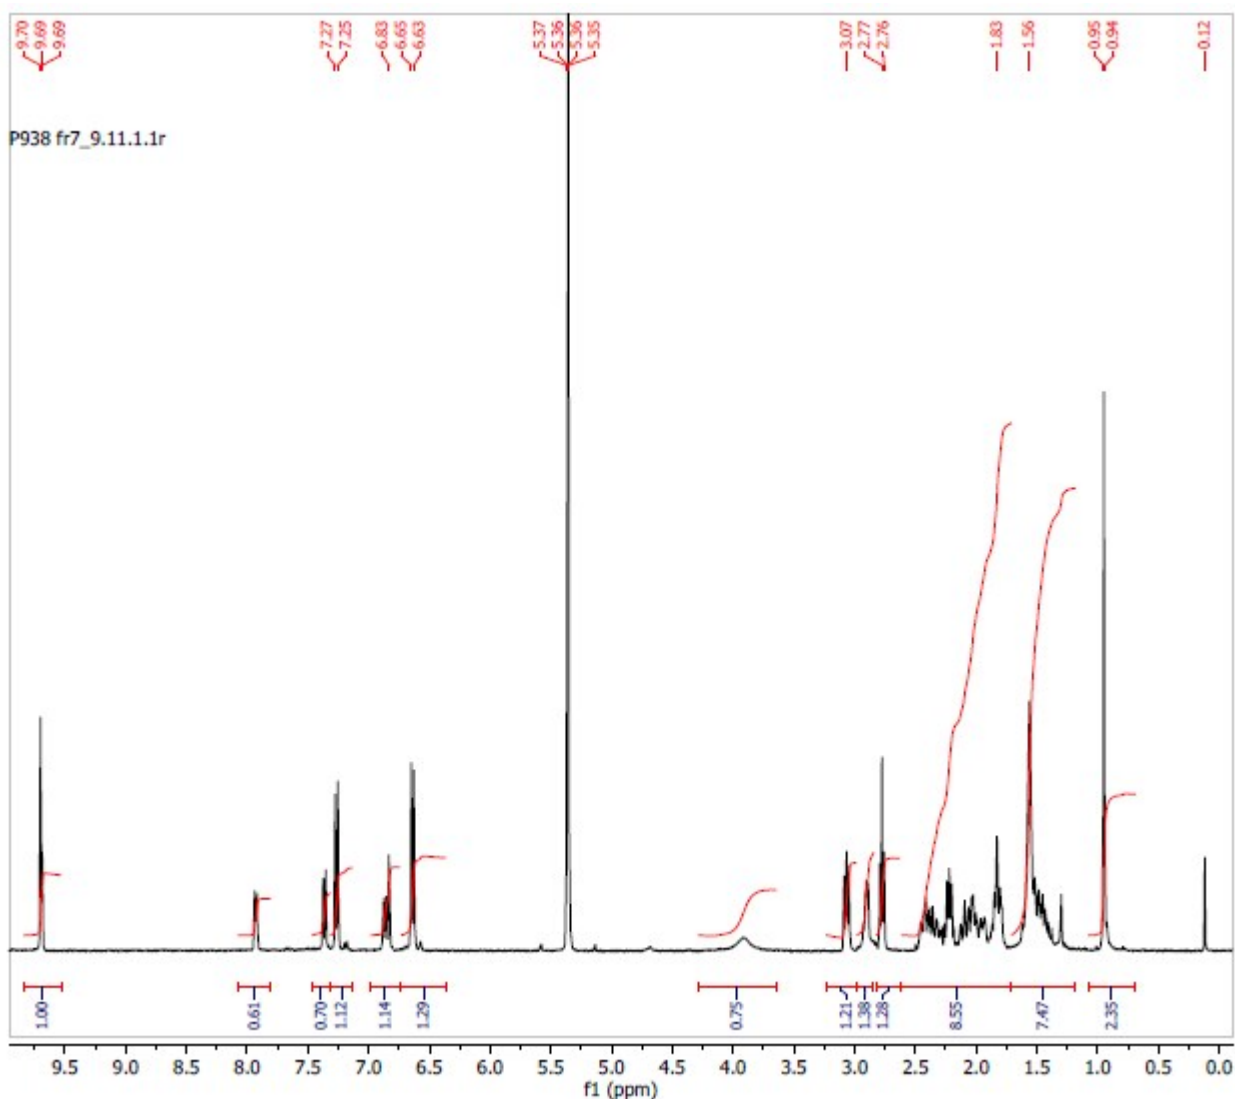

$^1H$  NMR ( $CD_2Cl_2$ , 400 MHz, 298 K):  $\delta$  = 9.70-9.69 (2H, m,  $H_c+H_d$  pydz), 7.95 (1H, m,  $H_e$  pydz), 7.36 (1H, d, H1 estradiol), 7.26 (2H, dd,  $H_b+H_{b'}$ ), 6.87 (1H, m, H2 estradiol), 6.83 (1H, m, H4 estradiol), 6.64 (2H, dd,  $H_a+H_{a'}$ ), 3.90 (1H, broad, 3-OH), 3.07 (2H, m,  $CH_2-CH_2-CH_2-COOH$ ), 2.90 (2H, m, H6), 2.77 (2H, m,  $CH_2-CH_2-CH_2-COOH$ ), 2.48-2.27 (3H, m, H11 $\alpha$ , H9, H12 $\beta$ ), 2.21 (2H, m,  $CH_2-CH_2-CH_2-COOH$ ), 2.15-1.75 (7H, m, H14, H15 $\alpha$ , H15 $\beta$ , H7 $\alpha$ , H16 $\beta$ , H16 $\alpha$ , H11 $\beta$ ), 1.5-1.35 (3H, m, H8, H12 $\alpha$ , H7 $\beta$ ), 0.95 (3H,  $CH_3$ )

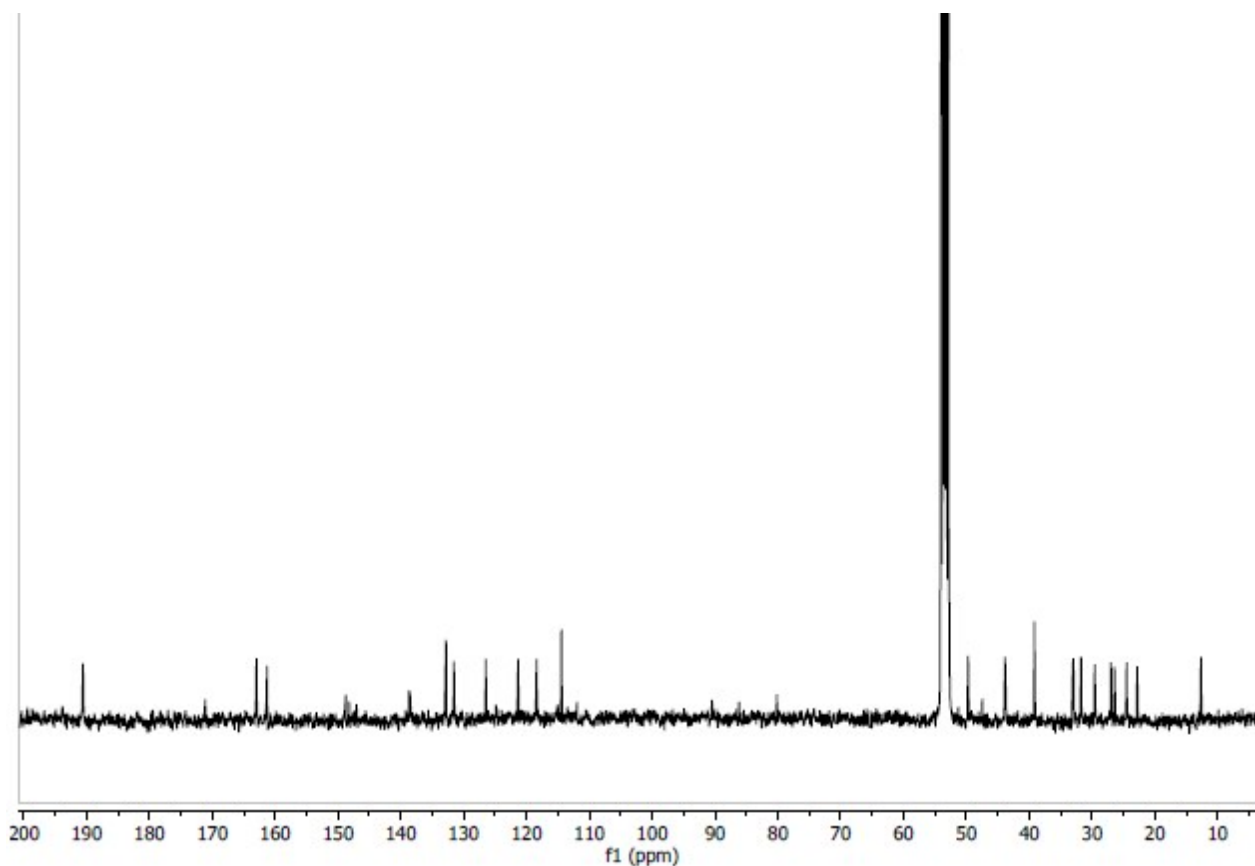

$^{13}\text{C}$  NMR ( $\text{CD}_2\text{Cl}_2$ , 400 MHz, 298 K):  $\delta = 190.57$  (1C, CO), 162.97 (1C,  $\text{C}_c$  pydz), 161.28 (1C,  $\text{C}_d$  pydz), 132.80 (2C,  $\text{C}_b + \text{C}_{b'}$ ), 131.55 (1C,  $\text{C}_e$  pydz), 126.46 (1C,  $\text{C}_1$  estradiol), 121.32 (1C,  $\text{C}_4$  estradiol), 118.38 (1C,  $\text{C}_2$  estradiol), 114.44 (2C,  $\text{C}_a + \text{C}_{a'}$ ), 49.70 (1C,  $\text{C}_{14}$  estradiol), 47.46 (1C, quater), 43.84 (1C,  $\text{C}_9$  estradiol), 39.15 (2C,  $\text{C}_8 + \text{C}_{11}$  estradiol), 33.05 (1C,  $\text{C}_{16}$  estradiol), 32.95 (1C,  $\text{CH}_2$ ), 31.74 (1C,  $\text{CH}_2$ ), 29.58 (1C,  $\text{C}_6$  estradiol), 27.98 (1C,  $\text{C}_7$  estradiol), 26.43 (1C,  $\text{C}_{12}$  estradiol), 24.49 (1C,  $\text{CH}_2$ ), 22.81 (1C,  $\text{C}_{15}$  estradiol), 12.65 (1C,  $\text{CH}_3$  estradiol).

COSY @400MHz in CD<sub>2</sub>Cl<sub>2</sub>

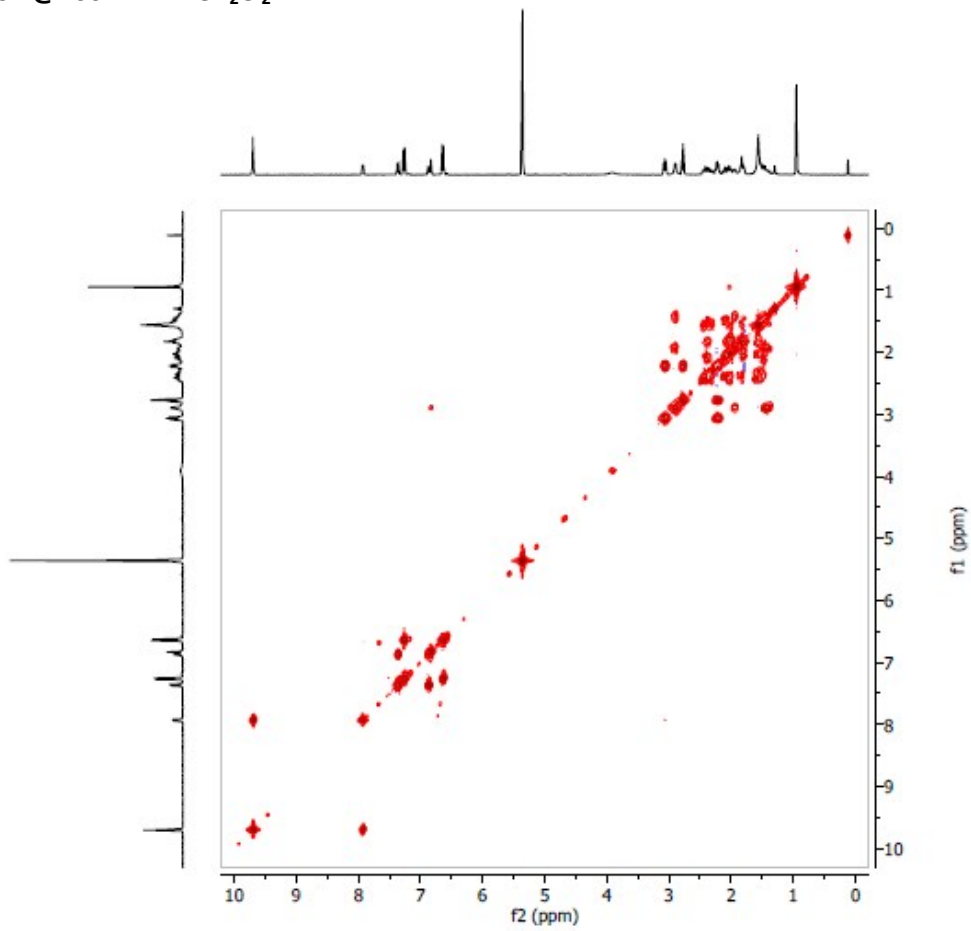

HSQC @400MHz in CD<sub>2</sub>Cl<sub>2</sub>

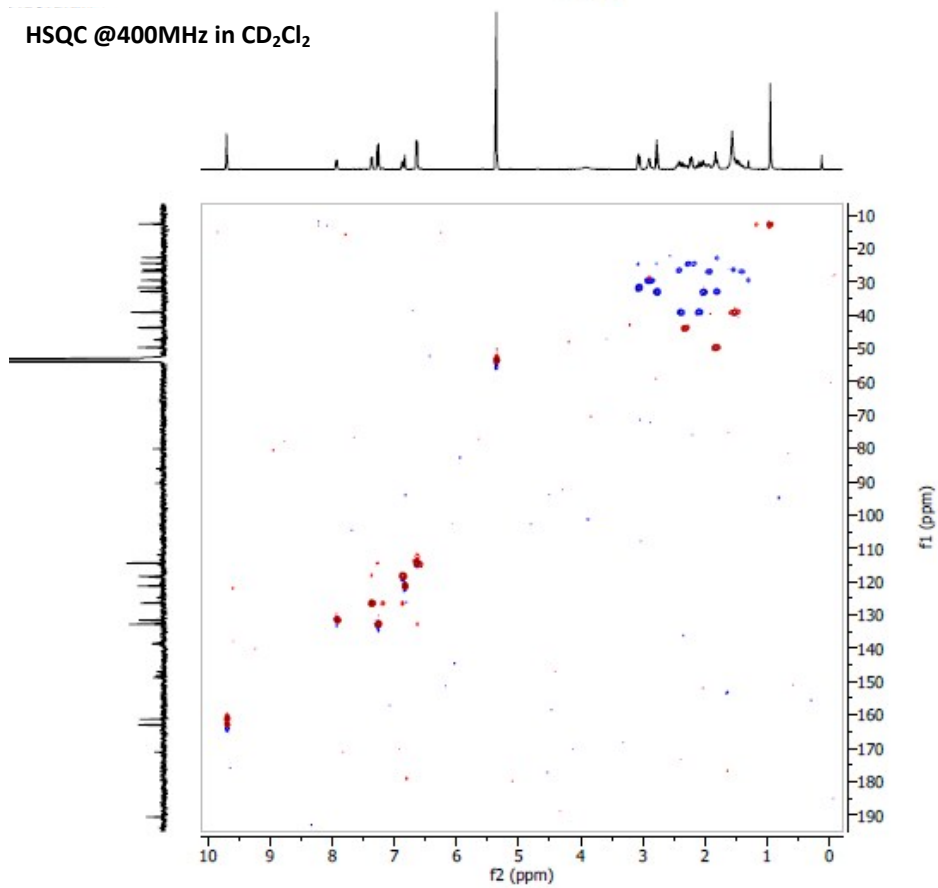

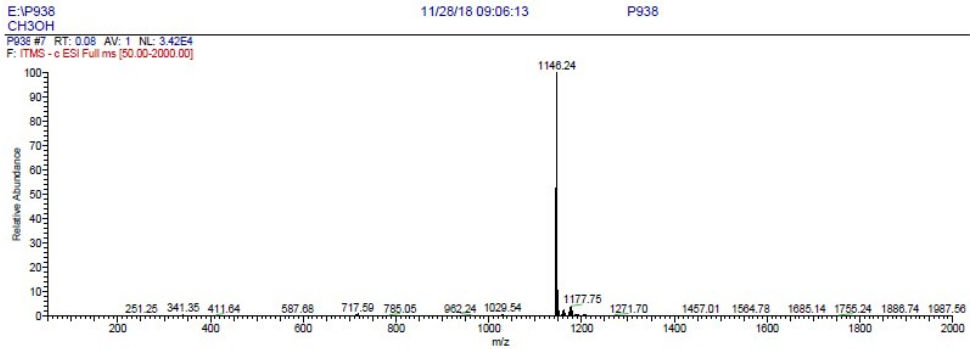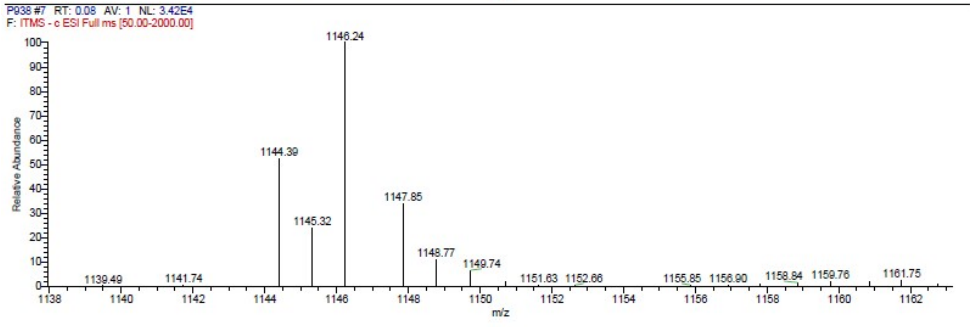

C40H37N3O9Re2Cl2: C40 H37 N3 O9 Re2 Cl2 pa Chrg 1

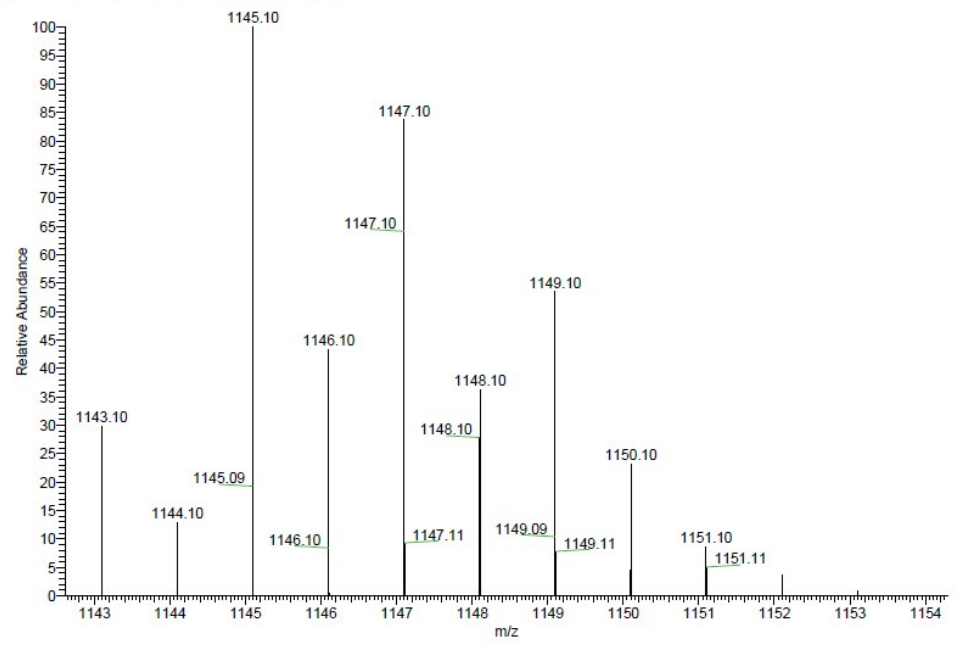

ESI-MS experimental and calculated (right) isotopic distribution for the **E2-Re2**

### Complex E2-Re3

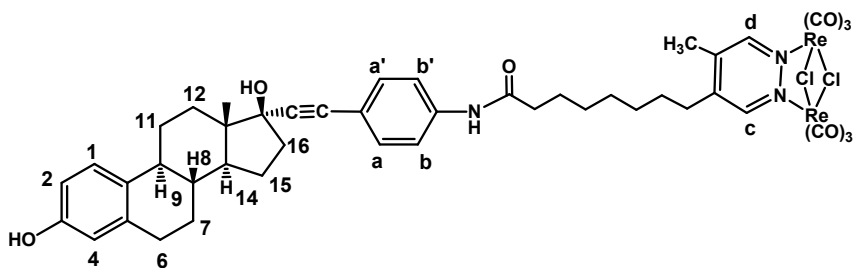

Chemical Formula:  $C_{45}H_{47}Cl_2N_3O_9Re_2$

Molecular Weight: 1217.18

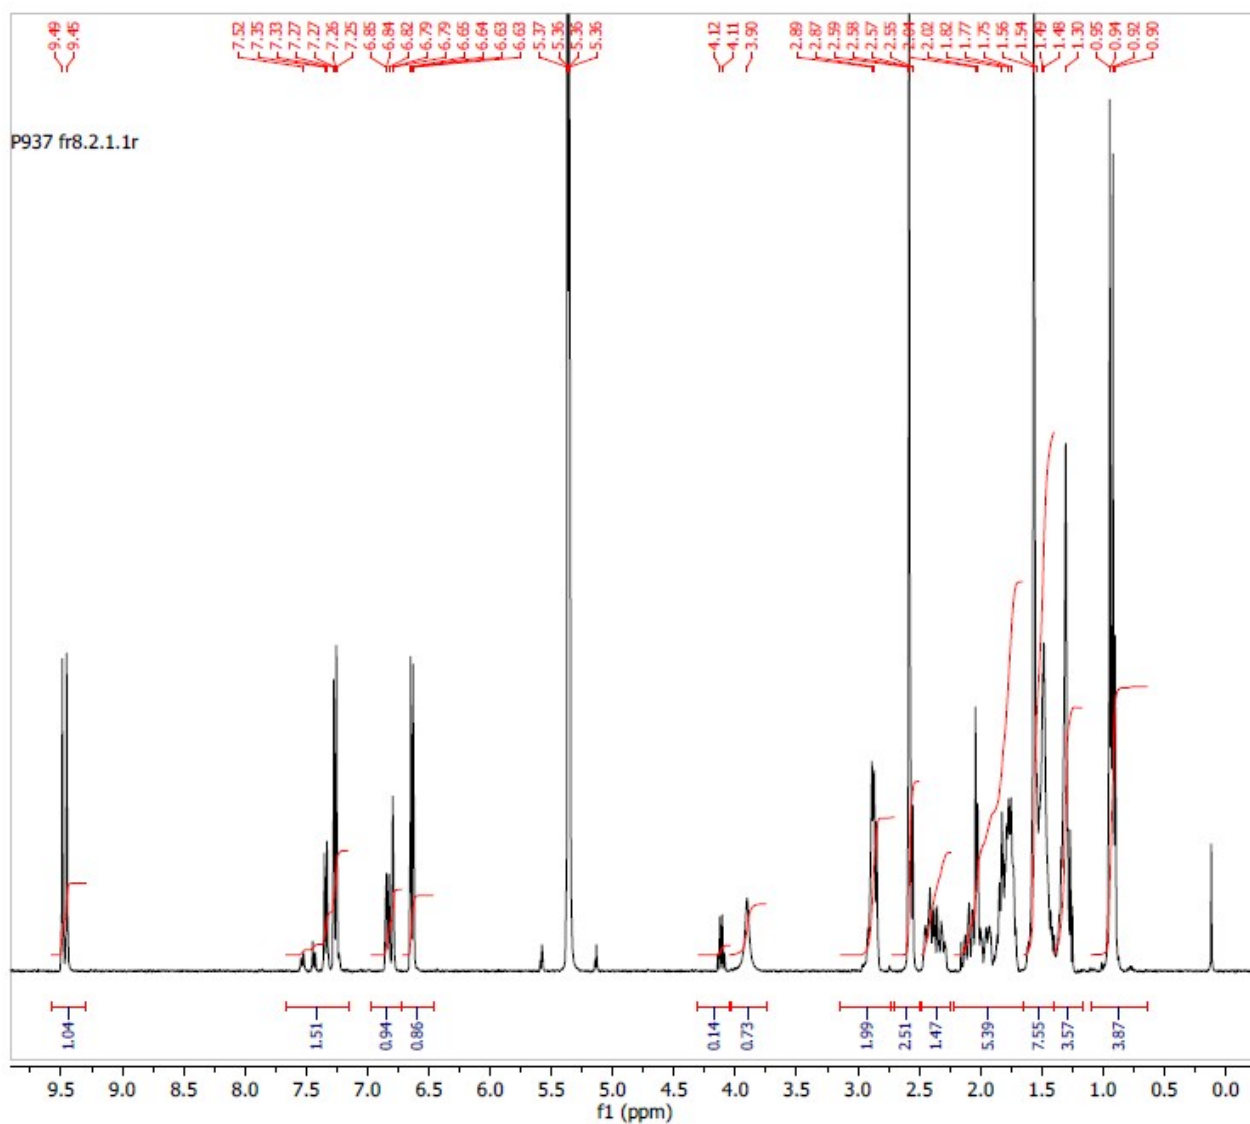

$^1H$  NMR ( $CD_2Cl_2$ , 400 MHz, 298 K):  $\delta$  = 9.49 (1H, s, H<sub>c</sub> pydz), 9.45 (1H, s, H<sub>d</sub> pydz), 7.34 (1H, d, H1 estradiol), 7.26 (2H, dd, H<sub>b</sub>+H<sub>b'</sub>), 6.83 (1H, m, H2 estradiol), 6.79 (1H, m, H4 estradiol), 6.64 (2H, m, H<sub>a</sub>+H<sub>a'</sub>), 3.90 (1H, broad, 3-OH), 2.87 (4H, m, -CH<sub>2</sub>-COOH and H6 estradiol), 2.59-2.57 (5H, m, CH<sub>3</sub> and CH<sub>2</sub> aliphatic chain),

2.50-2.25 (3H, m, H11 $\alpha$ , H9, H12 $\beta$ ), 2.17-1.90 (3H, m, H12 $\alpha$ , H16 $\alpha$ , H11 $\beta$ ), 1.85-1.67 (5H, m, H14, H15 $\alpha$ , H15 $\beta$ , H16 $\beta$ , H7 $\beta$ ), 1.6-1.20 (14H, m, H8, H7 $\alpha$ , and 10H of CH<sub>2</sub> aliphatic chain), 0.95 (3H, CH<sub>3</sub>)

<sup>13</sup>C-NMR in CD<sub>2</sub>Cl<sub>2</sub>

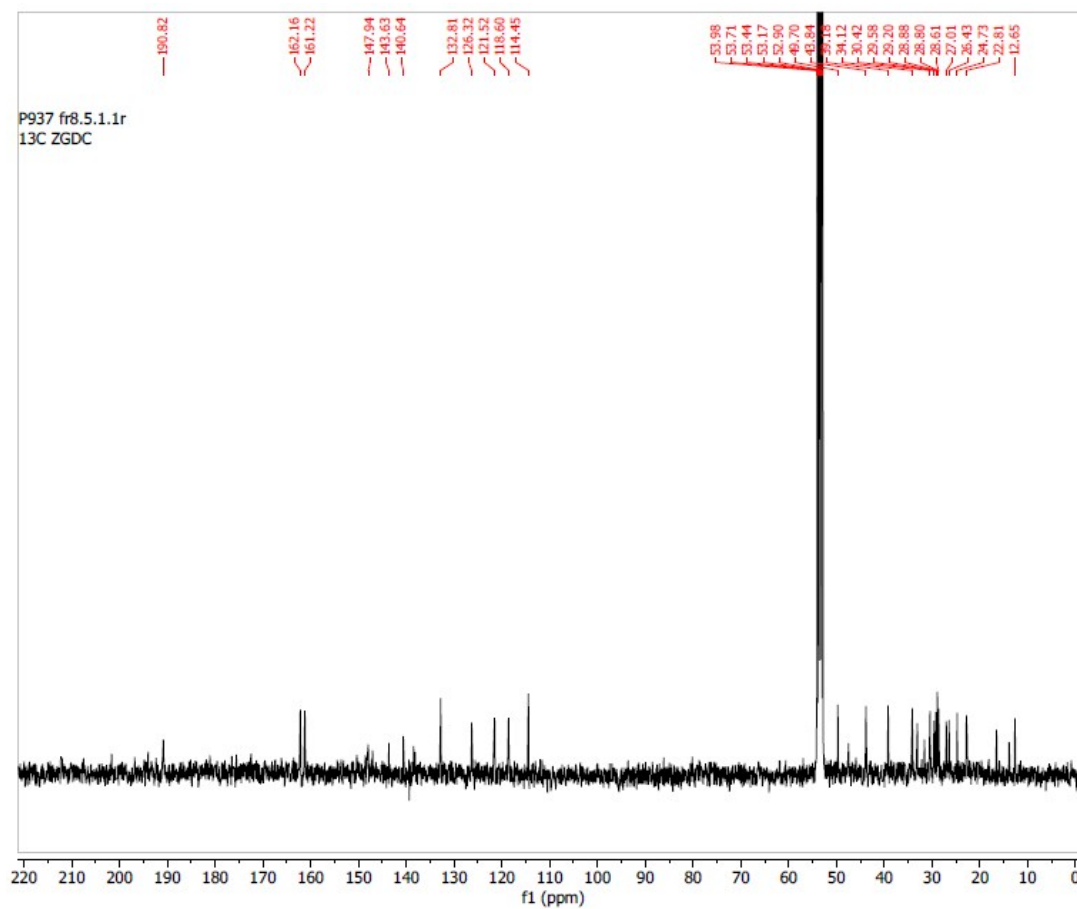



### <sup>13</sup>C NMR aliphatic region

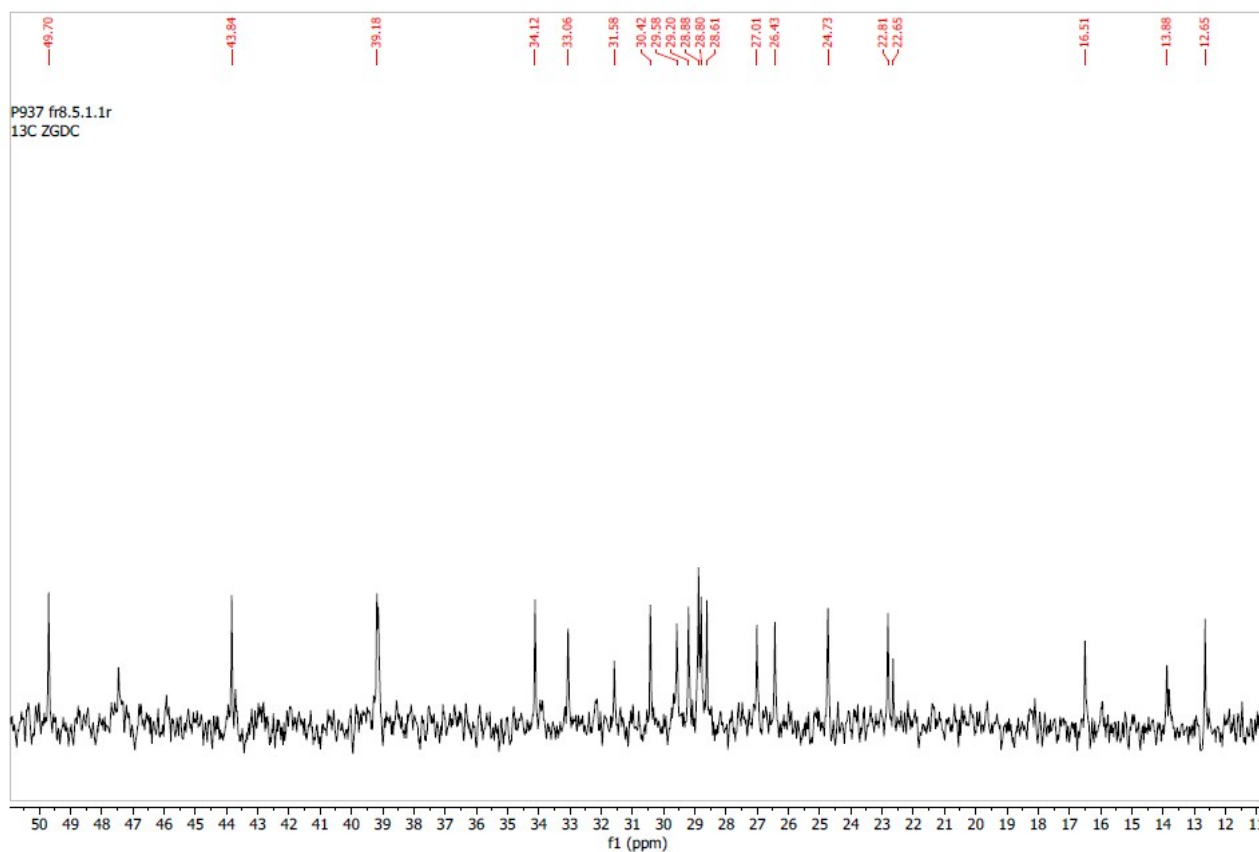

<sup>13</sup>C NMR (CD<sub>2</sub>Cl<sub>2</sub>, 400 MHz, 298 K):  $\delta$  = 190.82 (1C, CO), 162.16 (1C, C<sub>c</sub> pydz), 161.22 (1C, C<sub>d</sub> pydz), 132.81 (2C, C<sub>b</sub>+C<sub>b'</sub>), 126.32 (1C, C<sub>1</sub> estradiol), 121.52 (1C, C<sub>4</sub> estradiol), 118.60 (1C, C<sub>2</sub> estradiol), 114.45 (2C, C<sub>a</sub>+C<sub>a'</sub>), 49.70 (1C, C<sub>14</sub>, estradiol), 43.84 (1C, C<sub>9</sub> estradiol), 39.18 (2C, C<sub>8</sub>+C<sub>11</sub> estradiol), 34.12 (1C, CH<sub>2</sub>), 33.06 (1C, C<sub>16</sub> estradiol), 31.58 (1C, CH<sub>2</sub>), 30.42 (1C, CH<sub>2</sub>), 29.58 (1C, C<sub>6</sub> estradiol), 29.20 (1C, C<sub>7</sub> estradiol), 28.88 (1C, CH<sub>2</sub>), 28.80 (1C, CH<sub>2</sub>), 28.61 (1C, CH<sub>2</sub>), 27.01 (1C, C<sub>12</sub> estradiol), 26.43 (1C, CH<sub>2</sub>), 24.73 (1C, C<sub>15</sub> estradiol), 16.51 (1C, CH<sub>3</sub> pydz), 12.65 (1C, CH<sub>3</sub> estradiol).

COSY @400MHz, CD<sub>2</sub>Cl<sub>2</sub>

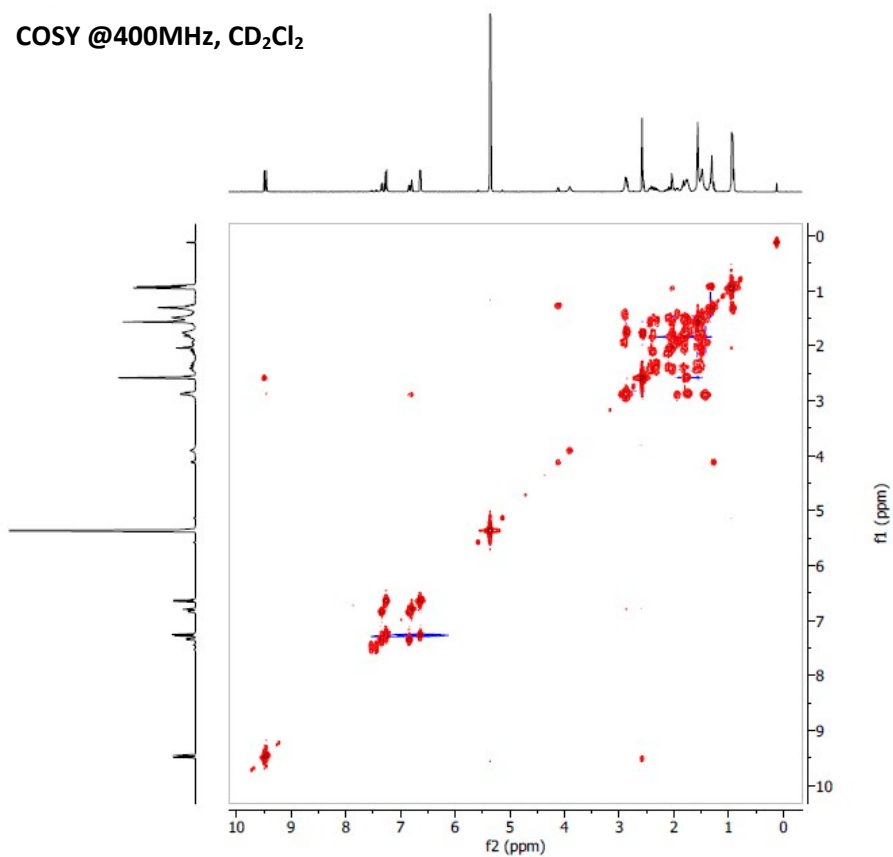

HSQC @400MHz, CD<sub>2</sub>Cl<sub>2</sub>

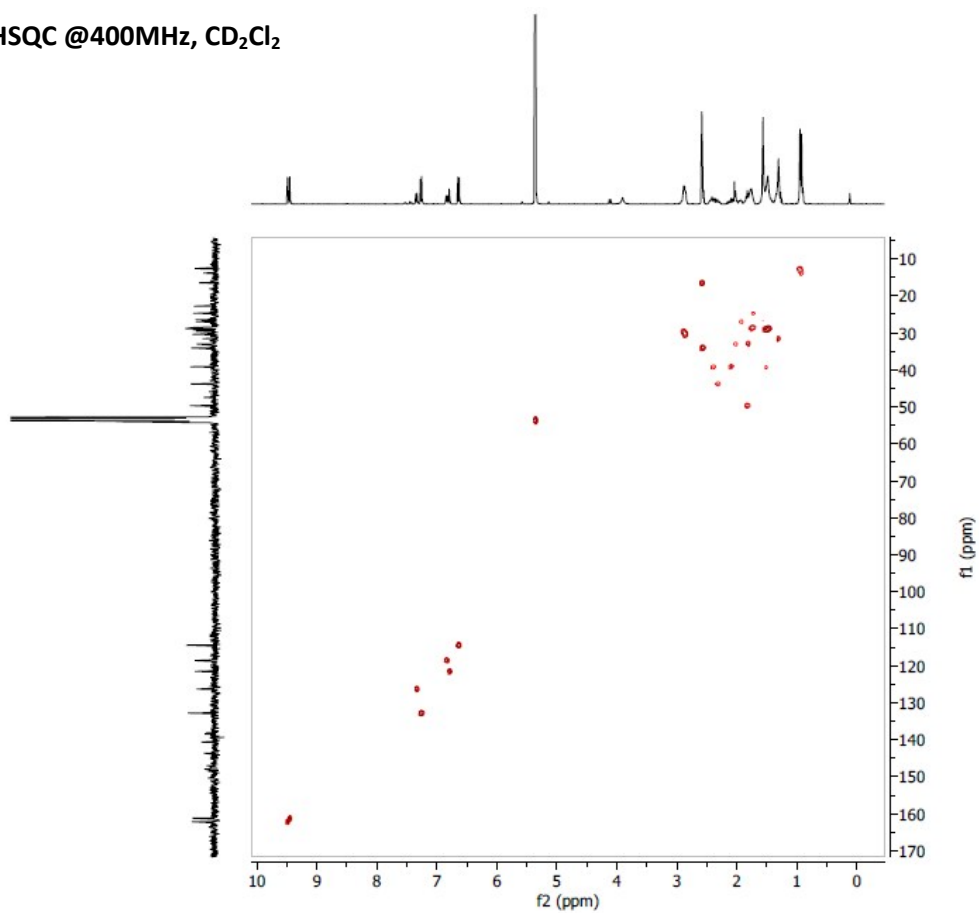

E:\P937  
CH3OH

11/28/18 09:18:49

P937

P637 #137 RT: 1.71 AV: 1 NL: 1.15E4  
F: ITMS + c ESI Full ms [50.00-2000.00]

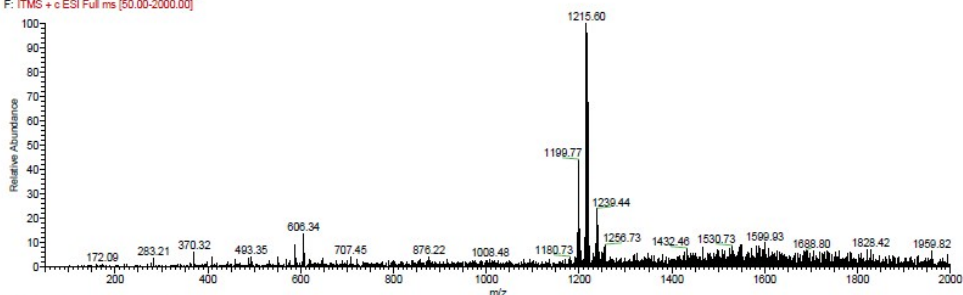

P637 #137 RT: 1.71 AV: 1 NL: 1.15E4  
F: ITMS + c ESI Full ms [50.00-2000.00]

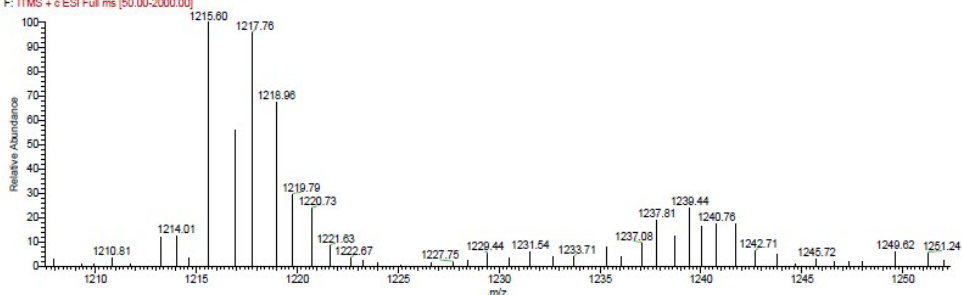

E:\P937  
CH3OH

11/28/18 09:18:49

P937

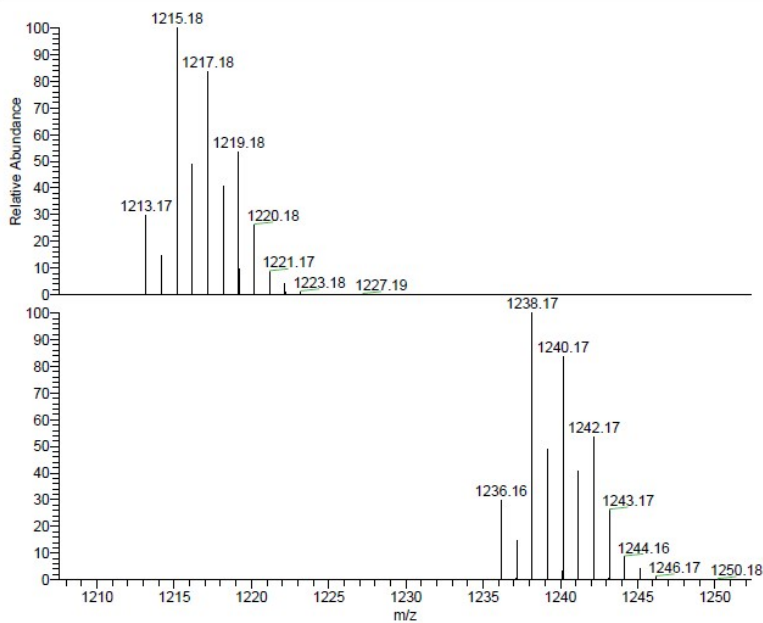

NL:  
1.59E5  
C45 H47 Cl2 N3 O9 Re2  
C45 H47 Cl2 N3 O9 Re2  
pa Chrg 1

NL:  
1.59E5  
C45 H47 Cl2 N3 O9 Re2 Na:  
C45 H47 Cl2 N3 O9 Re2 Na1  
pa Chrg 1

ESI-MS experimental and calculated (right) isotopic distribution for the E2-Re3

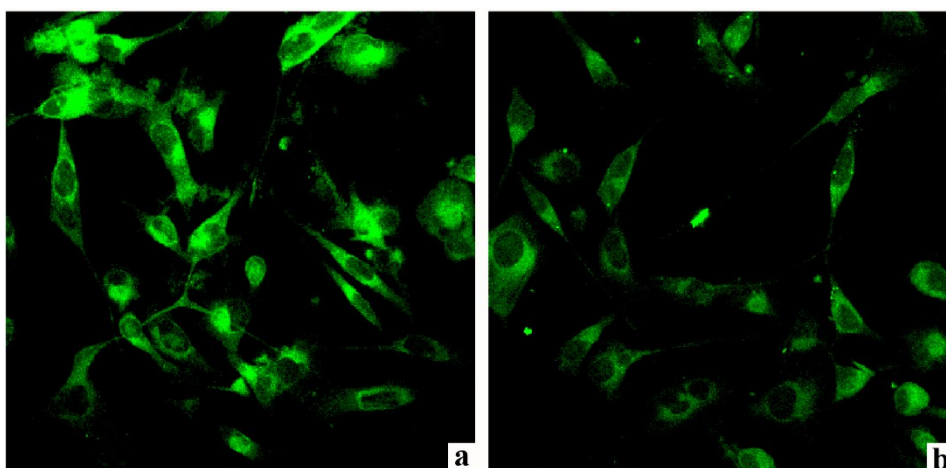

**Fig. S1:** Complex **E2-Re1** stains the 231 cell lines: a) 50  $\mu\text{M}$  of **E2-Re1** stains 231 cells for 60 min. (B) 50  $\mu\text{M}$  of florescent estradiol-free rhenium complex **Re-4Me** stains 231 cells.

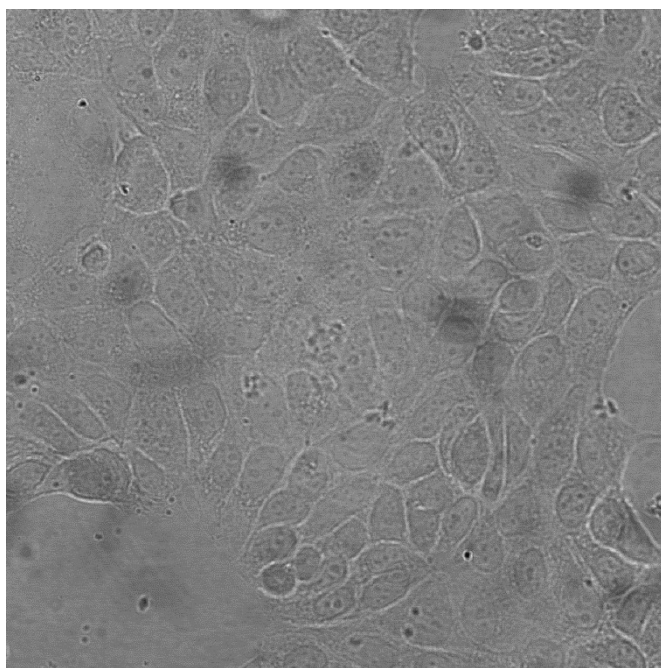

**Fig. S2:** Bright field image of MCF-7 cells recorded after the addition of **E2-Re1**.
